# Supplementary material for: Photoreactions of cyclic sulfite esters: Evidence for diradical intermediates
Source: publisher site journal article supplement (doi:10.3762/bjoc.8.134), 2012-07-30
Supplement: Additional file 1 [file 1860-5397-8-134-S1.pdf]

## Supporting Information

for

# Photoreactions of cyclic sulfite esters: Evidence for diradical intermediates

Rick C. White\*<sup>1</sup>, Benny E. Arney, Jr.<sup>1</sup> and Heiko Ihmels<sup>2</sup>

Address: <sup>1</sup>Department of Chemistry, Sam Houston State University, Huntsville, TX 77341, USA and <sup>2</sup>Department of Chemistry, Universität Siegen, Adolf-Reichwein-Str. 2, 57068 Siegen, Germany

Email: Rick C. White\* - [chm\\_rcw@shsu.edu](mailto:chm_rcw@shsu.edu)

\* Corresponding author

## <sup>1</sup>H NMR spectra of photolysates

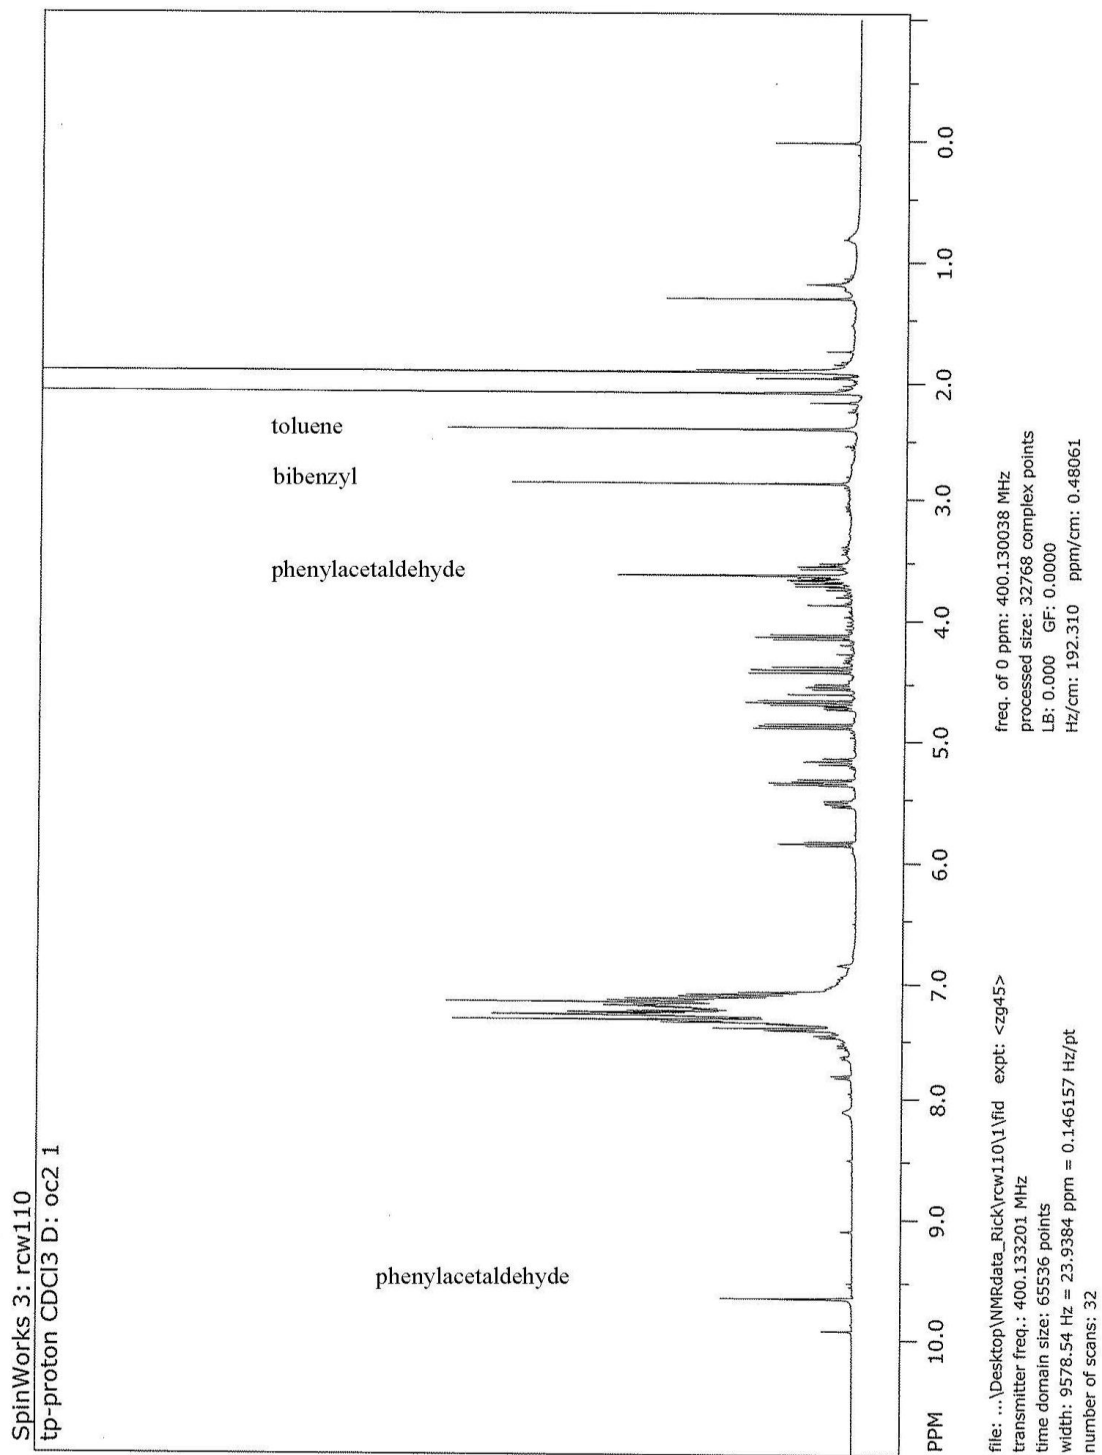

**Figure S1:**  $^1\text{H}$  NMR spectrum of the reaction mixture after irradiation of styrene glycol sulfite (**8**).

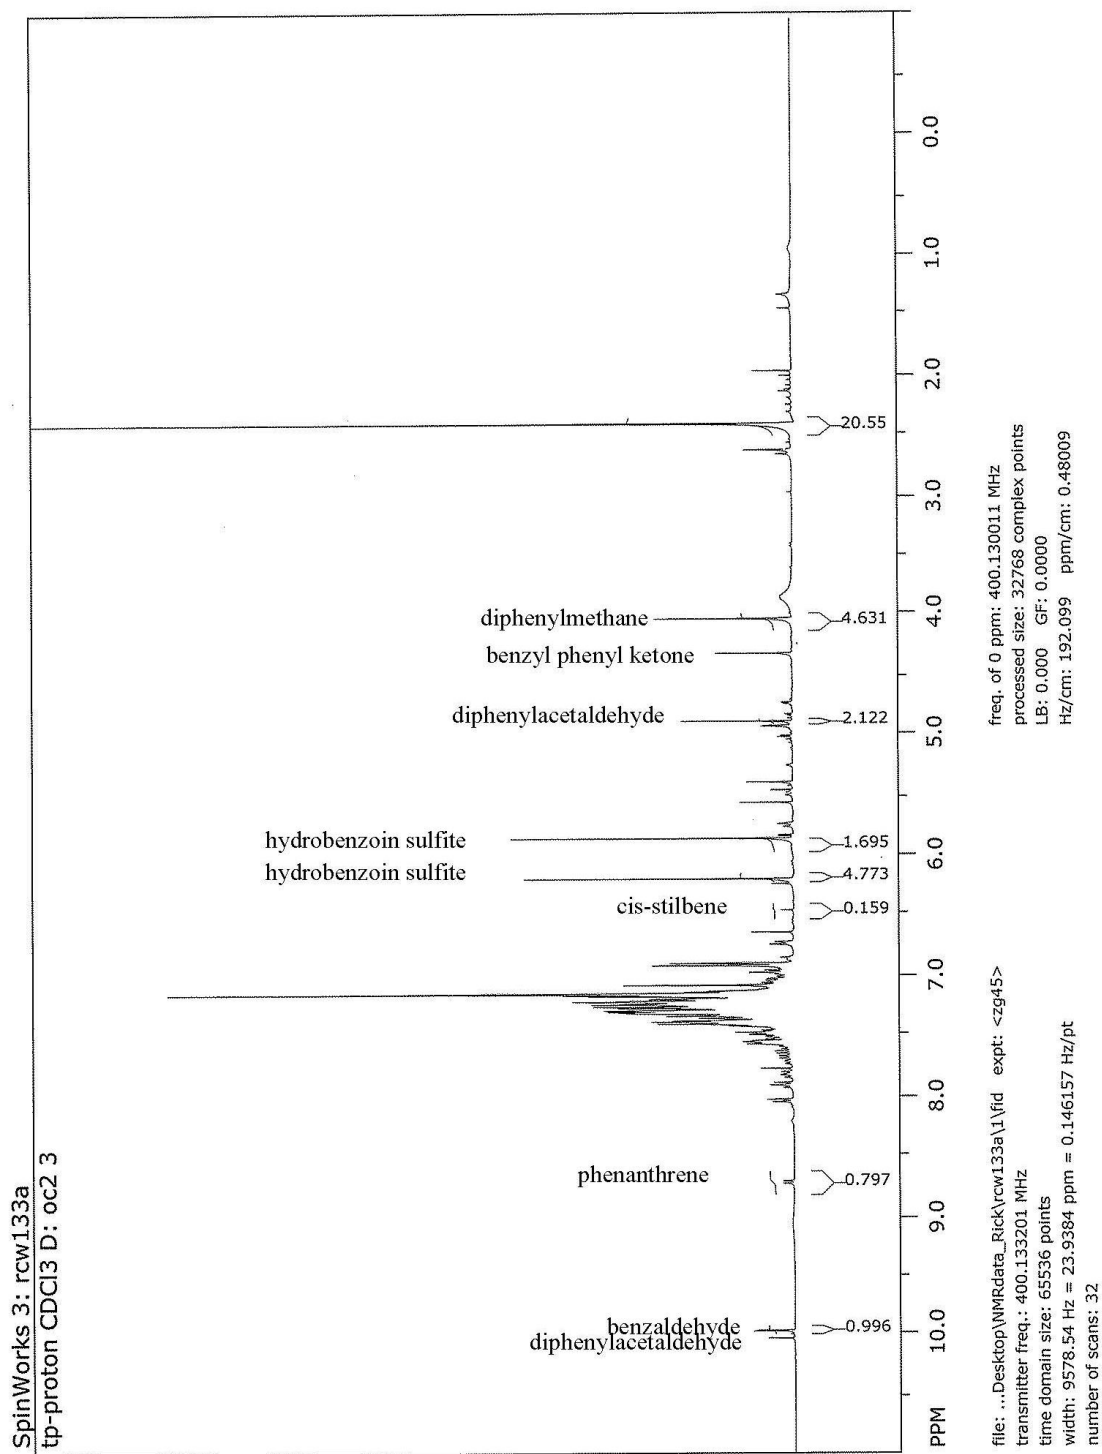

**Figure S2:**  $^1\text{H}$  NMR spectrum of the reaction mixture after irradiation of hydrobenzoin sulfite (**9**).
